# Supplementary material for: Effects of Buprenorphine Dose and Therapeutic Engagement on Illicit Opiate Use in Opioid Use Disorder Treatment Trials
Source: MDPI journal article supplement (doi:10.3390/ijerph19074106), 2022-03-30
Supplement: s1 [file s1]

Supplementary Tables for "Effects of Buprenorphine Dose and  
Therapeutic Engagement on Illicit Opiate Use in Opioid Use  
Disorder Treatment Trials"

Andrew W. Bergen, James W. Baurley, Carolyn M. Ervin, Christopher S. McMahan, Joe  
Bible, Randall S. Stafford, Sesh C. Mudumbai, Andrew J. Saxon

---

---

## List of Tables

|   |                                                                             |    |
|---|-----------------------------------------------------------------------------|----|
| 1 | Clinical Trial Study Designs . . . . .                                      | 3  |
| 2 | Study Inclusion Criteria . . . . .                                          | 4  |
| 3 | Study Exclusion Criteria I . . . . .                                        | 5  |
| 4 | Study Exclusion Criteria II . . . . .                                       | 6  |
| 5 | Demographics of Screened Individuals . . . . .                              | 7  |
| 6 | Sociodemographics of the Analysis Sample . . . . .                          | 8  |
| 7 | Drug Use History of the Analysis Sample . . . . .                           | 9  |
| 8 | Daily Dose, Urinalysis Days, and Time-Weighted Dose of a Single Participant | 10 |

**Table S1:** Clinical Trial Study Designs

| <b>Trial</b>              | <b>CSP-999</b>       | <b>CSP-1008A</b>             | <b>CSP-1008B</b> | <b>CSP-1018</b>       | <b>CTN-0027</b>    | <b>CTN-0030</b>            |
|---------------------------|----------------------|------------------------------|------------------|-----------------------|--------------------|----------------------------|
| Years, Start-End          | '92-'97              | '96-'97                      | '96-'97          | '99-'02               | '06-'10            | '06-'09                    |
| Allocation                | Randomized           | Randomized                   | Non-randomized   | Non-Randomized        | Randomized         | Randomized                 |
| Intervention              | Parallel             | Mixed                        | Single group     | Single group          | Parallel           | Parallel                   |
| Masking                   | Double blind         | Mixed                        | Open label       | Open label            | Open label         | Open label                 |
| Phases                    | Two                  | Two                          | One              | One                   | One                | Two                        |
| Purpose                   | Safety/Efficacy      | Efficacy/Safety <sup>α</sup> | Safety           | Efficacy <sup>β</sup> | Safety             | Efficacy                   |
| Tx length max (mo)        | 12                   | 12                           | 12               | 12                    | 8                  | 8                          |
| Tx Phase One (wk)         | 40                   | 4                            | 52               | 52                    | 24-32              | 4 Rx, 8 Counseling         |
| Rx <sup>γ</sup> Phase One | B                    | B:B/N:P                      | B/N              | B/N                   | B/N, M             | B/N                        |
| Rx Dose (g/d) Phase One   | 1:4:8:16             | 16:16/4,P                    | Per physician    | Per physician         | Per physician      | Per physician              |
| Psychosocial Phase One    | 1-4 hr/mo            | 1 hr/wk                      | ≥ 1hr/wk         | 0.5 hr/wk             | Per clinic         | 0.4:1.3 hr/wk <sup>δ</sup> |
| Administered Dose?        | Observed             | Mixed <sup>ε</sup>           | Per physician    | Not observed          | Mixed <sup>ζ</sup> | Not observed               |
| Tx Phase Two (wk)         | 12                   | 48                           | -                | -                     | -                  | 16                         |
| Rx Phase Two              | B                    | B/N                          | -                | -                     | -                  | B/N                        |
| Rx Dose Phase Two         | Per physician        | Per physician                | -                | -                     | -                  | Per physician              |
| Psychosocial Phase Two    | 1 hr/wk              | ≥ 1hr/wk                     | -                | -                     | -                  | 0.3:1.2 hr/wk              |
| Administered Dose?        | Observed             | Per physician                | -                | -                     | -                  | Not observed               |
| Urinalysis as Outcome     | Primary <sup>η</sup> | Primary                      | Secondary        | Primary               | Secondary          | Primary                    |

From [clinicaltrials.gov](https://clinicaltrials.gov) and [datashare.nida.nih.gov](https://datashare.nida.nih.gov). <sup>α</sup>For Phase One, and Safety for Phase Two. <sup>β</sup>For adult participants, and safety, efficacy, and feasibility of detoxification, then maintenance per clinical judgement in participants 15 to 20 years of age. <sup>γ</sup>Rx: B=buprenorphine, B/N=buprenorphine/naloxone, P=placebo, M=methadone. <sup>δ</sup>Standard Medical Management *vs* Enhanced Medical Management, aka Opioid Drug Counseling). <sup>ε</sup>Doses are observed weekdays, take-home doses weekends. <sup>ζ</sup>For B/N, first three days observed, remaining doses per physician; for M, observed. <sup>η</sup>Self-reported lapse.

**Table S2: Study Inclusion Criteria**

| Study     | Inclusion Criteria*                                                                                                                                                                                                                                                                                                                                                                                                                                                                                                                                                                                                                                                                                                                                                                                                                                                                                                                                                                                                 |
|-----------|---------------------------------------------------------------------------------------------------------------------------------------------------------------------------------------------------------------------------------------------------------------------------------------------------------------------------------------------------------------------------------------------------------------------------------------------------------------------------------------------------------------------------------------------------------------------------------------------------------------------------------------------------------------------------------------------------------------------------------------------------------------------------------------------------------------------------------------------------------------------------------------------------------------------------------------------------------------------------------------------------------------------|
| CSP-999   | Males and females (non-pregnant, non-nursing), ages 21-50. Current opiate dependence according to DSM-III-R/DSM-IV criteria with daily use for past month. Agreeable to conditions of the study and signs informed consent. Resident within commuting distance of clinic. Urine negative for methadone.                                                                                                                                                                                                                                                                                                                                                                                                                                                                                                                                                                                                                                                                                                             |
| CSP-1008A | Males and females (non-pregnant, non-nursing), ages 18-59 inclusive. Current opiate dependence according to DSM-IV criteria. Treatment seeking. Agreeable to conditions of the study and able to give informed consent.                                                                                                                                                                                                                                                                                                                                                                                                                                                                                                                                                                                                                                                                                                                                                                                             |
| CSP-1008B | Males and females (non-pregnant, non-nursing), ages 18-59 inclusive. Current opiate dependence according to DSM-IV criteria. Treatment seeking. Agreeable to conditions of the study and able to give informed consent.                                                                                                                                                                                                                                                                                                                                                                                                                                                                                                                                                                                                                                                                                                                                                                                             |
| CSP-1018  | Males and females (non-pregnant, non-nursing), at least 15 years of age. Current opiate dependence according to DSM-IV criteria. Treatment seeking with the desire to discontinue opiate use as an initial goal but willing to consider and accept longer treatment if necessary. Be in good physical health, or in the care of a physician for medical or psychiatric treatment. Agreeable to conditions of the study and able to give informed consent.                                                                                                                                                                                                                                                                                                                                                                                                                                                                                                                                                           |
| CTN-0027  | Males and females (non-pregnant, non-nursing), at least 18 years of age. Current opiate dependence according to DSM-IV-TR criteria. Treatment seeking. Agreeable to conditions of the study and able to give informed consent.                                                                                                                                                                                                                                                                                                                                                                                                                                                                                                                                                                                                                                                                                                                                                                                      |
| CTN-0030  | Males and females at least 18 years of age, treatment seeking (detoxification), and meet DSM-IV criteria for current prescription opioid dependence ( $\geq 20$ days/month). Without chronic pain severe enough to require ongoing opioid therapy or an acute pain event within the past six months. Medically stable and psychiatrically stable in the opinion of the study investigator. Good general health, or, for patients receiving ongoing medical or psychiatric treatment, participant's physician must be willing to continue management and cooperate with study physicians. Participants receiving opioids for pain must have clearance from their prescribing physician to enter the trial; the study physician will consult to ensure that the participant is medically stable enough to enter the trial. Participants who use prescription opioids by injection may be included as long as they have never injected heroin. Agreeable to conditions of the study and able to give informed consent. |

\*From [clinicaltrials.gov](https://clinicaltrials.gov) and [datashare.nida.nih.gov](https://datashare.nida.nih.gov) protocols. Some rewording to enhance comparability.

**Table S3:** Study Exclusion Criteria I

| Study     | Exclusion Criteria*                                                                                                                                                                                                                                                                                                                                                                                                                                                                                                                                                                                                                                                                                                                                                                                                                    |
|-----------|----------------------------------------------------------------------------------------------------------------------------------------------------------------------------------------------------------------------------------------------------------------------------------------------------------------------------------------------------------------------------------------------------------------------------------------------------------------------------------------------------------------------------------------------------------------------------------------------------------------------------------------------------------------------------------------------------------------------------------------------------------------------------------------------------------------------------------------|
| CSP-999   | Any acute medical condition that would make participation in the study medically hazardous for the patient, with extra monitoring and hepatologist consultation where liver enzymes are > 5 and > 8 times upper limit of normal, respectively. DSM-III-R diagnosis of current alcohol dependence or sedative-hypnotic dependence. Current daily use of anticonvulsants, Antabuse, or neuroleptics. Expected inability to complete study. Enrollment in a methadone maintenance program within past 30 days. Participation in another research project. Female of childbearing potential who refuses birth control.                                                                                                                                                                                                                     |
| CSP-1008A | Any acute medical condition that would make participation in the study medically hazardous for the patient. Liver enzyme levels > 3 times upper limit of normal. Current use of systemic anti-retroviral or anti-fungal therapy. DSM-IV diagnosis of any psychoactive substance dependence other than opiate, caffeine, or nicotine dependence. Licit or illicit use of methadone, LAAM or naltrexone within the last days. Use of buprenorphine, other than as an analgesic, within the last 365 days. Expected inability to complete study. Enrollment in a methadone or LAAM maintenance program within past 45 days. Female of childbearing potential who refuses birth control.                                                                                                                                                   |
| CSP-1008B | Any acute medical condition that would make participation in the study medically hazardous for the patient. Liver enzyme levels > 3 times upper limit of normal. Current use of systemic anti-retroviral or anti-fungal therapy. DSM-IV diagnosis of any psychoactive substance dependence other than opiate, caffeine, or nicotine dependence. Licit or illicit use of methadone, LAAM or naltrexone within the last days. Use of buprenorphine, other than as an analgesic, within the last 365 days. Expected inability to complete study. Enrollment in a methadone or LAAM maintenance program within past 45 days. Female of childbearing potential who refuses birth control.                                                                                                                                                   |
| CSP-1018  | Any acute medical condition that would make participation in the study medically hazardous for the patient, with hepatologist consultation where liver enzymes are > 8 times upper limit of normal. Known sensitivity to buprenorphine or naloxone. Acutely psychotic, severely depressed or an immediate suicide risk. Dependence upon alcohol, benzodiazepines or other drugs of abuse (excluding tobacco) requiring immediate medical attention. Participation in an investigational drug study within the past 30 days. Discontinued participation in a methadone or LAAM treatment program within the past 30 days. Licit or illicit use of methadone, LAAM or naltrexone for more than 30 days before enrolling in this study. Female of childbearing potential who refuses birth control. Expected inability to complete study. |

\*From [clinicaltrials.gov](https://clinicaltrials.gov) and [datashare.nida.nih.gov](https://datashare.nida.nih.gov) protocols. Some rewording to enhance comparability.

**Table S4:** Study Exclusion Criteria II

| Study    | Exclusion Criteria*                                                                                                                                                                                                                                                                                                                                                                                                                                                                                                                                                                                                                                                                                                                                                                                                                                                                                                                                                                                                                                                                                                                                                                                               |
|----------|-------------------------------------------------------------------------------------------------------------------------------------------------------------------------------------------------------------------------------------------------------------------------------------------------------------------------------------------------------------------------------------------------------------------------------------------------------------------------------------------------------------------------------------------------------------------------------------------------------------------------------------------------------------------------------------------------------------------------------------------------------------------------------------------------------------------------------------------------------------------------------------------------------------------------------------------------------------------------------------------------------------------------------------------------------------------------------------------------------------------------------------------------------------------------------------------------------------------|
| CTN-0027 | Any acute medical condition that would make participation in the study medically hazardous for the patient. Liver enzymes (either) > 5 times upper limit of normal. Alkaline phosphatase > 3 times upper limit of normal. Model for Endstage Liver Disease score $\geq 11$ . Total bilirubin $\geq 2\text{mg/dl}$ , albumin < 2.5 g/dl or prothrombin time > 3 seconds. Participants with cardiac risk factors as confirmed by abnormal ECGs. Known sensitivity to buprenorphine, methadone, naloxone or any study medication ingredient. Diagnosis of acute psychosis, severe depression or an immediate suicide risk. DSM-IV dependence upon alcohol, benzodiazepines, other depressants or stimulants, requiring medical immediate attention or likelihood of intravenous misuse by past history of intravenous use. Participation in an investigational drug study within the past 30 days. Treatment with methadone, buprenorphine, buprenorphine/naloxone, for $\geq 15$ of the past 30 days (illicit use is not an exclusion). Female of childbearing potential who refuses birth control. Expected inability to complete study. Poor venous access.                                                       |
| CTN-0030 | Any medical condition that would make participation in the study medically hazardous for the patient, in the opinion of the study investigator/physician, based on a review of medical records and baseline evaluations. Known sensitivity to buprenorphine, or naloxone. Diagnosis of acute psychosis, severe depression, or a suicide risk within the past 30 days. DSM-IV dependence upon alcohol, sedative-hypnotics or stimulants, and requiring medical immediate attention. Currently receiving formal substance abuse treatment. Have used heroin $\geq 4$ days in the past 30 days. Lifetime opioid dependence accounted for by heroin use only. Have ever used heroin by injection. Have experienced a traumatic or major pain event within the past six months. Participation in another investigational drug study within the past 30 days. Participated in methadone or buprenorphine maintenance treatment for opioid dependence within 30 days of study enrollment. Female of childbearing potential who refuses birth control. Expected inability to complete study due to residence change or scheduled surgery. Pain of sufficient severity as to require ongoing pain management with opioids. |

\*From [clinicaltrials.gov](https://clinicaltrials.gov) and [datashare.nida.nih.gov](https://datashare.nida.nih.gov) protocols. Some rewording to enhance comparability.

**Table S5:** Demographics of Screened Individuals

| <b>Trial</b>   | <b>CSP-999</b> | <b>CSP-1008A</b> | <b>CSP-1008B</b> | <b>CTN-1018</b> | <b>CTN-0027</b> | <b>CTN-0030</b> | <b>Overall</b> |
|----------------|----------------|------------------|------------------|-----------------|-----------------|-----------------|----------------|
| Totals         | (N = 736)      | (N = 449)        | (N = 282)        | (N = 596)       | (N = 1920)      | (N = 870)       | (N = 4853)     |
| Age (Years)    |                |                  |                  |                 |                 |                 |                |
| Mean (SD)      | 36.0 (7.8)     | 37.6 (8.9)       | 40.0 (7.7)       | 35.8 (10.5)     | 37.4 (11.1)     | 33.2 (10.2)     | 36.33 (10.6)   |
| Min, Max       | (18, 67)       | (19, 60)         | (19, 59)         | (15, 66)        | (18, 68)        | (18, 77)        | (18, 77)       |
| Missing (n, %) | 2 (0.3)        | 123 (27.4)       | 77 (27.3)        | 29 (4.9)        | 651 (33.1)      | 216 (24.8)      | 1098 (22.6)    |
| Gender, n (%)  |                |                  |                  |                 |                 |                 |                |
| Male           | 497 (67.5)     | 290 (64.7)       | 202 (71.6)       | 394 (66.1)      | 1285 (67.0)     | 524 (60.3)      | 3192 (65.8)    |
| Female         | 239 (32.5)     | 158 (35.3)       | 80 (28.4)        | 202 (33.9)      | 632 (33.0)      | 345 (39.7)      | 1656 (34.2)    |
| Missing        | 0 (0.0)        | 1 (0.0)          | 0 (0.0)          | 0 (0.0)         | 3 (0.1)         | 1 (0.0)         | 5 (0.1)        |
| R/Eth, n (%)   |                |                  |                  |                 |                 |                 |                |
| W, Non-His     | 359 (48.8)     | 257 (57.4)       | 115 (40.8)       | 437 (73.4)      | 1243 (64.7)     | 751 (86.3)      | 3162 (65.2)    |
| B, Non-His     | 161 (21.9)     | 136 (30.4)       | 94 (33.3)        | 46 (7.7)        | 212 (11.0)      | 30 (3.4)        | 679 (14.0)     |
| Nat Amer       | 5 (0.7)        | 4 (0.9)          | 0 (0.0)          | 7 (1.2)         | 65 (3.4)        | 16 (1.8)        | 97 (2.0)       |
| As/Pac Is      | 4 (0.5)        | 8 (1.8)          | 2 (0.7)          | 11 (1.8)        | 36 (1.9)        | 4 (0.5)         | 65 (1.3)       |
| Hispanic       | 207 (28.1)     | 43 (9.6)         | 71 (25.2)        | 94 (15.8)       | 329 (17.1)      | 42 (4.8)        | 786 (16.2)     |
| Other          | 0 (0.0)        | 0 (0.0)          | 0 (0.0)          | 0 (0.0)         | 35 (1.8)        | 27 (3.1)        | 62 (1.3)       |
| Missing        | 0 (0.0)        | 1 (0.2)          | 0 (0.0)          | 1 (0.2)         | 0 (0.0)         | 0 (0.0)         | 2 (0.004)      |

**Table S6:** Sociodemographics of the Analysis Sample

| <b>Characteristic</b>     | <b>N or Mean</b> | <b>% or SD</b> |
|---------------------------|------------------|----------------|
| <b>Age</b>                | 36.1             | 9.8            |
| <b>Gender</b>             |                  |                |
| Men                       | 2017             | 67             |
| Women                     | 1005             | 33             |
| <b>OMB Race/Ethnicity</b> |                  |                |
| Other                     | 6                | <1             |
| Asian                     | 48               | 2              |
| American Indian           | 50               | 2              |
| Black                     | 422              | 14             |
| Hispanic                  | 495              | 16             |
| White                     | 2001             | 66             |
| <b>Education</b>          |                  |                |
| Less than 7th grade       | 15               | <1             |
| Complete Graduate School  | 89               | 3              |
| Junior High School        | 116              | 4              |
| Standard College          | 213              | 7              |
| Partial High School       | 304              | 10             |
| Partial College           | 829              | 27             |
| High School               | 1456             | 48             |
| <b>Employment Type</b>    |                  |                |
| Military                  | 1                | <1             |
| Controlled                | 17               | 1              |
| Student                   | 64               | 2              |
| Retired                   | 84               | 3              |
| Regular PT                | 232              | 8              |
| Irregular PT              | 284              | 9              |
| Unemployed                | 582              | 19             |
| Fulltime                  | 1758             | 58             |
| <b>Employment History</b> |                  |                |
| Executive                 | 53               | 2              |
| Business Manager          | 101              | 3              |
| Unskilled                 | 235              | 8              |
| Administrative            | 239              | 8              |
| Clerical/Sales            | 407              | 13             |
| Machine Operator          | 445              | 15             |
| Never Gainfully           | 653              | 22             |
| Skilled Manual            | 889              | 29             |
| <b>Marital Status</b>     |                  |                |
| Remarried                 | 20               | <1             |
| Widowed                   | 39               | 1              |
| Separated                 | 261              | 9              |
| Divorced                  | 602              | 20             |
| Never Married             | 1014             | 34             |
| Married                   | 1038             | 34             |
| <b>Living Arrangement</b> |                  |                |
| No Stable                 | 24               | 1              |
| Controlled                | 25               | 1              |
| Child Only                | 183              | 6              |
| Alone                     | 190              | 6              |
| Friends                   | 255              | 8              |
| Family                    | 263              | 9              |
| Parents                   | 294              | 10             |
| Partner Only              | 537              | 18             |
| Partner and Child         | 1251             | 41             |
| <b>Annual Income</b>      | \$20,834         | \$30,024       |



**Table S7:** Drug Use History of the Analysis Sample

| Variable                                 | N or Mean | % or SD |
|------------------------------------------|-----------|---------|
| <b>Heroin and opioid use</b>             |           |         |
| Heroin use                               | 2354      | 78      |
| No heroin use                            | 668       | 22      |
| <b>Years of opiate/opioid use</b>        | 8.23      | 8.41    |
| <b>Primary mode of opiate/opioid use</b> |           |         |
| Oral                                     | 122       | 4       |
| IV                                       | 1710      | 57      |
| Snort                                    | 1089      | 36      |
| Smoking                                  | 74        | 2       |
| Sublingual                               | 5         | < .01   |
| Other                                    | 22        | 1       |
| <b>Cocaine use</b>                       |           |         |
| YES                                      | 1837      | 61      |
| NO                                       | 1185      | 39      |
| <b>Methamphetamine use</b>               |           |         |
| YES                                      | 718       | 24      |
| NO                                       | 2304      | 76      |
| <b>Alcohol use</b>                       |           |         |
| YES                                      | 1891      | 63      |
| NO                                       | 1131      | 37      |
| <b>Tranquilizer use</b>                  |           |         |
| YES                                      | 1025      | 34      |
| NO                                       | 1997      | 66      |
| <b>Marijuana use</b>                     |           |         |
| YES                                      | 1953      | 65      |
| NO                                       | 1069      | 35      |
| <b>Phencyclidine use</b>                 |           |         |
| YES                                      | 477       | 16      |
| NO                                       | 2545      | 84      |

**Table S8:** Daily Dose, Urinalysis Days, and Time-Weighted Dose of a Single Participant

| Variable        | Data                                                                                                                                                                                                                                                                                                                                                                                                                                                                                                                                        |
|-----------------|---------------------------------------------------------------------------------------------------------------------------------------------------------------------------------------------------------------------------------------------------------------------------------------------------------------------------------------------------------------------------------------------------------------------------------------------------------------------------------------------------------------------------------------------|
| Daily Dose      | 8 16 24 24 32 32 32 32 32 32 32 32 32 32 32 32 32 32 32 32 32 32 32 32 32 32 32 32 32 32 32 32 32 32<br>32 32 32 32 32 0 0 32 32 32 32 32 32 32 32 32 32 32 32 32 32 32 32 32 32 32 32 32 32 32 32 32 32 0 32<br>32 32 32 0 32 32 32 32 32 32 32 32 32 32 32 0 32 32 32 32 32 32 0 32 32 0 32 32 32 32 32 32 32 32 32<br>32 32 32 32 32 30 30 30 30 30 30 30 30 30 32 30 30 30 30 0 32 30 30 30 30 30 30 30 30 30 30 30 30 30 30<br>30 30 30 30 30 30 30 30 30 30 30 30 30 26 26 26 28 28 28 28 28 28 24 26 26 26 26 22 0 24 24 24 24 24 24 |
| Urinalysis Days | 7 17 23 35 41 52 56 64 72 79 93 101 108 122 128 136 143 149 158 163 171                                                                                                                                                                                                                                                                                                                                                                                                                                                                     |
| Time            | 29.58730 31.99768 31.99996 32.00000 16.00000 31.97656 31.99854 31.99999 31.00000 31.74219                                                                                                                                                                                                                                                                                                                                                                                                                                                   |
| Weighted Dose   | 23.93748 31.71851 31.99780 30.06274 29.59473 29.99842 29.99999 30.00000 27.95312 25.99854 23.62499                                                                                                                                                                                                                                                                                                                                                                                                                                          |
